# Supplementary material for: Effects of two different dual-task training protocols on gait, balance, and cognitive function in community-dwelling older adults: a 24-week randomized controlled trial
Source: PeerJ. 2023 Apr 21;11:e15030. doi: 10.7717/peerj.15030 (PMC10124542; doi:10.7717/peerj.15030)
Supplement: Supplemental Information 2 — All the gait, cognition and postural balance outcomes of the participants acquired at time 1, 2 and 3. [file peerj-11-15030-s002.xlsx]

## Sheet: EQO-I_Dataset
SUBJECT	ID	GROUP	TIME	Gait_Speed_TS	Gait_Variability_TS	Gait_Assimetry_TS	CycleDuration_D_TS	Cadence_D_TS	StrideLength_D_TS	StrideVelocity_D	Stance_D_TS	Swing_D_TS	DoubleSupport_TS	PeakAngVelocity_D_TS	SwingSpeed_D_TS	MinToe_D_TS_T0	Gait_Speed_DTPV	Gait_Variability_DTPV	Gait_Assimetry_DTPV	CycleDuration_D_DTPV	Cadence_D_DTPV	StrideLength_D_DTPV	StrideVelocity_D_DTPV	Stance_D_DTPV	Swing_D_DTPV	DoubleSupport_DTPV	PeakAngVelocity_D_DTPV	SwingSpeed_D_DTPV	MinToe_D_DTPV	Gait_Speed_DTPF	Gait_Variability_DTPF	Gait_Assimetry_DTPF	CycleDuration_D_DTPF	Cadence_D_DTPF	StrideLength_D_DTPF	StrideVelocity_D_DTPF	Stance_D_DTPF	Swing_D_DTPF	DoubleSupport_DTPF	PeakAngVelocity_D_DTPF	SwingSpeed_D_DTPF	MinToe_D_DTPF	TUGconv	TUGcog	TUGDualTaskEffect	TUGmotor	TSLS	EERE	EERI
1	s01	GC	1	1.11	2.85	0	1.01	119.05	1.09	1.1	60.97	39.03	21.64	387.1	3.47	0.02	1.04	2.15	0.5	1.04	115.4	1.06	1.03	61.07	38.93	22.3	366.4	3.29	0.02	0.95	4.52	-2.1	1.09	110.17	1.01	0.94	62.33	37.67	23.75	342.4	3.07	0.02	11.5	19.5	-69.57	13	6	2	2
1	s01	GC	2	1.1	2.24	1.5	1.04	115.9	1.12	1.1	61.39	38.61	22.07	387.9	3.5	0.02	1.05	2.48	1.2	1.06	113.21	1.09	1.05	61.54	38.46	22.56	366.5	3.36	0.03	0.99	2.99	0.9	1.09	110.37	1.06	0.99	61.7	38.3	23.04	350	3.21	0.02	10.1	14.2	-40.59	10.5	6	0	1
1	s01	GC	3	1.41	2.89	-0.42	1.03	122.62	1.28	1.24	57.56	41.5	15.52	423.66	3.95	0.02	1.25	3.16	-0.96	1.05	121.89	1.22	1.34	57.67	43.1	16.85	415.2	3.9	0.02	1.29	2.62	-0.29	1.01	122.54	1.33	1.31	58.29	41.85	17.57	411.2	4.27	0.02	13	20.1	-54.62	15.4	5	3	3
2	s02	GC	1	1.41	2.57	-1.9	1.01	120.84	1.38	1.41	60.78	39.22	20.13	444	4.24	0.02	1.38	3.58	-3.5	0.99	120.65	1.36	1.37	60.73	39.27	19.71	433.9	4.13	0.02	1.4	2.62	-3	0.99	121.76	1.38	1.41	60.25	39.75	19.2	445.1	4.21	0.02	8.3	7.4	10.84	9.6	5	0	3
2	s02	GC	2	1.43	1.92	5.9	0.99	120.99	1.41	1.43	58.64	41.36	14.57	449.3	4.27	0.02	1.46	2.43	5.3	0.98	122.59	1.42	1.46	59.39	40.61	16.3	461.7	4.32	0.02	1.4	2.48	6.2	1	119.8	1.4	1.4	57.68	42.32	12.73	433.2	4.23	0.02	7.2	8.1	-12.5	8.4	7	2	3
2	s02	GC	3	1.31	2.22	5.5	1.01	118.52	1.32	1.31	60.29	39.71	18.22	442.9	4.1	0.01	1.35	1.58	10.9	1.04	119.5	1.34	1.35	60.56	39.44	16.08	449.3	4.22	0.02	1.37	2.27	9.9	0.99	120.73	1.34	1.37	60.06	39.94	15.74	456.9	4.18	0.01	8.1	8.5	-4.94	8.4	5	3	3
3	s03	GE	1	1.4	1.9	1.7	1.05	118.85	1.39	1.4	59.17	40.83	18.05	385.7	4.31	0.04	1.32	1.97	3.2	1.08	114.86	1.39	1.34	59.17	40.83	18.45	383.4	4.11	0.04	1.31	1.77	0.3	1.15	111.48	1.35	1.29	59.65	40.35	19.53	383	4.02	0.04	10.2	12	-17.65	10.7	6	0	0
3	s03	GE	2	1.38	1.62	-0.4	0.98	122.9	1.32	1.38	58	42	16.13	415.9	4.18	0.02	1.43	1.29	1.9	0.99	121.22	1.4	1.43	58.62	41.38	16.24	415.8	4.32	0.02	1.42	1.99	-0.5	0.98	121.89	1.38	1.42	58.48	41.52	17.03	420.3	4.28	0.02	8.5	8	5.88	8.7	5	2	1
3	s03	GE	3	1.44	2.18	1.1	1.02	122.95	1.37	1.44	58.25	41.75	14.88	427.6	4.45	0.03	1.3	1.62	2.8	1.07	116.02	1.32	1.3	59.95	40.05	17.74	406.2	4.07	0.02	1.36	5.37	2.7	1.02	117.85	1.37	1.36	59.17	40.83	16.95	411.2	4.17	0.02	9.4	8.4	10.64	10.3	5	2	3
4	s04	GC	1	1.34	2.43	3.1	1.03	119.59	1.36	1.38	56.95	43.05	14.16	437	4.27	0.03	1.29	3.33	4.8	1.02	117.88	1.33	1.32	57.01	42.99	16.13	415.3	4.11	0.03	1.17	4.6	3.7	1.06	113.23	1.25	1.19	58.29	41.71	18.15	397.3	3.83	0.03	8	9.6	-20	10.2	6	2	2
4	s04	GC	2	1.37	4.51	-0.5	0.97	124.02	1.3	1.37	56.89	43.11	13.8	466.8	4.43	0.01	1.3	2.29	-0.5	1.01	120.59	1.27	1.3	58.12	41.88	15.36	448.2	4.29	0.02	1.32	2.97	0.1	0.98	122.39	1.28	1.32	57.32	42.68	14.5	458.5	4.29	0.02	9.3	9.7	-4.3	10.4	4	1	3
4	s04	GC	3	1.46	3	-1.7	0.96	124.91	1.39	1.46	56.27	43.73	13.14	499.1	4.67	0.02	1.41	2.24	-2.8	0.97	123.54	1.36	1.41	56.24	43.76	13.7	489.6	4.59	0.02	1.39	3.9	-2.4	0.99	121.4	1.36	1.39	56.58	43.42	14.05	479.4	4.51	0.02	8.3	10.1	-21.69	10.6	6	2	2
5	s05	GE	1	1.61	2.28	3.1	0.76	158.28	1.2	1.61	56.56	43.44	11.62	523.8	4.65	0.03	1.53	3.97	2.6	0.8	151.04	1.19	1.53	57.59	42.41	14.14	494.6	4.46	0.02	1.48	3.97	-0.5	0.8	149.62	1.17	1.48	58.17	41.83	16.27	470.8	4.33	0.02	7.2	10.1	-40.28	10.3	3	1	3
5	s05	GE	2	1.26	2.75	0.2	0.92	130.89	1.16	1.29	58.82	41.18	17.78	406.9	3.9	0.02	1.5	2.86	-1.5	0.95	126.96	1.11	1.2	58.77	41.23	18.1	391.6	3.75	0.03	1.19	3.1	0.9	0.95	125.84	1.12	1.19	59.46	40.54	18.64	391.2	3.7	0.03	7.8	8.9	-14.1	9	2	1	2
5	s05	GE	3	1.27	2.72	-0.33	0.98	122.52	1.29	1.43	58.01	41.69	15.37	419.09	4.05	0.03	1.39	2.71	0.89	1.01	121.29	1.46	1.34	57.85	42.89	16.09	417.82	3.82	0.04	1.53	2.83	-0.13	1.01	121.97	1.29	1.5	58.52	41.66	16.55	414.33	4.28	0.02	9.76	11.15	-14.24	12.49	4.96	0	0
6	s06	GC	1	1.4	3.66	0.6	0.93	129.18	1.27	1.4	55.7	44.3	11.61	407.2	4.16	0.03	1.4	3.41	1	0.92	130.19	1.25	1.38	55.86	44.14	12.41	414.4	4.15	0.03	1.22	5.44	0.8	0.97	124.05	1.15	1.21	57.1	42.9	14.35	374	3.73	0.03	9.4	14.5	-54.26	12.2	2	1	2
6	s06	GC	2	1.31	3.8	-1.3	0.94	127.09	1.21	1.31	56.22	43.78	13.03	410.4	4.03	0.03	1.38	2.27	0.1	0.93	128.54	1.26	1.38	56.16	43.84	12.17	426.9	4.23	0.03	1.31	3.6	-0.2	0.95	126.66	1.22	1.31	56.81	43.19	13.63	412.8	4.07	0.03	8	7.5	6.25	10.5	4	2	2
6	s06	GC	3	1.39	2.26	-1.3	0.97	128.51	1.25	1.39	55.93	44.07	11.16	402.4	4.28	0.04	1.4	2.21	-1	0.91	131.75	1.23	1.4	55.51	44.49	11.48	437.6	4.28	0.03	1.34	2.25	-1.2	0.93	129.38	1.21	1.34	56.14	43.86	12.73	425.1	4.18	0.03	9	10	-11.11	9.9	4	2	3
7	s07	GE	1	1.62	2.61	1.7	0.9	133.15	1.42	1.61	55.98	44.02	12.65	499	5.06	0.04	1.6	3.14	1.1	0.92	130.21	1.41	1.55	56.69	43.31	13.82	464.7	4.89	0.03	1.35	3.15	0.3	0.98	122.78	1.29	1.34	57.91	42.09	15.87	433.2	4.38	0.03	10.3	11.9	-15.53	10.4	4	3	2
7	s07	GE	2	1.31	2.53	-0.5	0.98	123.02	1.26	1.31	57.31	42.69	14.77	475.8	4.44	0.03	1.28	3.16	0.9	1	119.63	1.27	1.28	57.74	42.26	15.04	468.6	4.4	0.03	1.2	1.89	-0.2	1.02	117.41	1.21	1.2	58.19	41.81	16.49	450.8	4.16	0.03	10.5	11.1	-5.71	10.4	6	3	2
7	s07	GE	3	1.27	2.4	-0.19	1.07	121.76	1.34	1.34	57.85	42.16	15.62	421.21	4.04	0.02	1.25	3	0.49	1.03	122.36	1.19	1.45	58.3	42.03	17.15	411.18	3.96	0.03	1.29	3.08	-0.65	0.98	120.03	1.37	1.28	58	41.45	16.88	408.46	4.22	0.03	10.24	11.53	-12.6	10.1	4.43	0	0
8	s08	GC	1	1.39	2.54	7.1	1.19	123.37	1.42	1.51	58.43	41.57	17.82	346.5	4.67	0.04	1.34	3.67	5	0.97	124.21	1.35	1.41	56.57	43.43	18.06	384.4	4.29	0.03	1.35	3.51	9	0.98	124.87	1.43	1.52	57.71	42.29	18.4	301.3	4.59	0.04	8.1	9.46	-16.79	10.2	3	3	2
8	s08	GC	2	1.44	2.08	-1.1	0.94	127.73	1.34	1.44	57.63	42.37	15.66	419.5	4.5	0.03	1.29	2.78	-1.3	0.97	123.46	1.23	1.29	57.97	42.03	16.47	397.9	4.11	0.03	1.33	2.47	1.4	0.95	125.79	1.25	1.33	58.46	41.54	16.31	406	4.25	0.03	7.6	7.8	-2.63	9.9	3	3	3
8	s08	GC	3	1.41	1.69	-6.9	0.98	122.61	1.36	1.41	56.69	43.31	16.22	427.9	4.38	0.02	1.35	2.61	-4.1	0.98	122.04	1.31	1.35	57.17	42.83	15.86	415	4.28	0.02	1.28	2.1	-8.6	1.01	118.43	1.29	1.28	57.31	42.69	18	401.6	4.09	0.02	7.3	8.9	-21.92	9	4	3	3
9	s09	GE	1	1.45	1.42	2.4	0.93	129.42	1.29	1.42	55.2	44.8	11.38	441.8	4.31	0.04	1.27	1.95	2.9	0.97	123.51	1.2	1.26	55.68	44.32	12.64	403.7	3.95	0.04	1.26	2.53	2.7	0.97	123.34	1.2	1.25	56.19	43.81	13.43	403.8	3.96	0.04	8.3	11	-32.53	10.4	2	1	1
9	s09	GE	2	1.39	1.36	-1.7	1	125.73	1.27	1.39	56.82	43.18	11.58	451.4	4.29	0.04	1.4	2.74	-3.2	0.94	128.09	1.3	1.4	55.13	44.87	12.67	435.9	4.28	0.04	1.35	1.88	-5.6	0.96	125.61	1.27	1.35	56.2	43.8	13.57	420.3	4.23	0.04	8.9	10.3	-15.73	10.2	5	2	2
9	s09	GE	3	1.38	1.57	-2.5	0.96	124.86	1.31	1.38	55.09	44.91	11.26	444.4	4.37	0.04	1.3	1.5	-3.4	0.98	122.66	1.26	1.3	55.34	44.66	12.2	422.8	4.2	0.04	1.28	2.32	-2.3	0.99	121.72	1.25	1.28	55.68	44.32	12.31	420	4.14	0.04	9.1	11.9	-30.77	9	2	1	1
10	s10	GC	1	1.46	3.07	0.5	0.86	138.78	1.23	1.45	58.25	41.75	16.66	466.9	4.55	0.03	1.35	2.76	-1.4	0.91	132.43	1.18	1.32	59.75	40.25	18.98	432.1	4.25	0.03	1.42	2.48	-0.5	0.88	136.45	1.21	1.41	58.96	41.04	17.67	464.1	4.44	0.03	11.2	10	10.71	12.3	6	0	2
10	s10	GC	2	1.45	1.86	1.6	0.88	137.1	1.25	1.45	58.35	41.65	16.06	483.4	4.6	0.03	1.39	1.82	2.7	0.87	137.56	1.2	1.39	58.49	41.51	15.9	478	4.47	0.04	1.37	2.79	3	0.88	137.18	1.17	1.37	59.03	40.97	16.71	464.5	4.47	0.04	9.3	10.2	-9.68	10.9	6	0	0
10	s10	GC	3	1.19	2.33	1.8	0.98	122.51	1.14	1.19	60.21	39.79	17.35	437.4	3.98	0.04	1.2	1.21	1.22	1.24	113.13	1.28	1.3	58.08	41.92	17.02	406	3.94	0.04	1.33	2.62	1	0.99	120.86	1.29	1.24	58.38	41.06	16.19	411.86	4.21	0.03	11.4	12.1	-6.14	14.2	7	0	2
11	s11	GC	1	1.38	3.25	-0.9	0.95	126.66	1.3	1.38	58.73	41.27	16.95	417.7	4.24	0.03	1.39	2.19	-1.2	0.95	126.78	1.32	1.41	58.63	41.37	16.76	407.7	4.3	0.04	1.26	3.03	0.1	0.97	123.61	1.23	1.28	58.83	41.17	17.59	405.4	4.01	0.03	9.2	10.1	-9.78	0	6	0	1
11	s11	GC	2	1.35	2.54	0.23	0.99	124.33	1.27	1.44	58.55	42.06	15.41	419.17	4.38	0.02	1.32	2.65	0.41	1.05	121.21	1.31	1.19	58.01	41.46	17.37	409.3	3.94	0.03	1.45	2.71	1.6	1.03	120.76	1.19	1.23	59	41.66	16.19	406.24	4.13	0.02	9.57	9.98	-4.28	11.4	4.62	1.64	1.96
11	s11	GC	3	1.18	2.69	-0.15	0.98	121.4	1.17	1.29	58.32	41.78	15.38	418.26	4.17	0.04	1.45	2.66	0.56	0.96	120.79	1.32	1.28	58.31	43.6	15.76	415.02	4.24	0.03	1.2	2.61	-0.93	1	122.42	1.26	1.28	58.79	41.76	16.58	408.03	4.05	0.03	10.55	10.73	-1.71	11.7	5.08	0	0
12	s12	GE	1	1.36	2.57	-4.3	1.03	116.66	1.46	1.43	59.05	40.95	16.26	417.6	4.57	0.03	1.13	5.84	-2.4	1.16	104.18	1.34	1.18	60.94	39.06	20.97	388	3.98	0.03	1.11	4.14	3	1.12	109.13	1.34	1.25	60.83	39.17	20.13	383.5	4.21	0.03	9.3	12.3	-32.26	13.7	4	0	3
12	s12	GE	2	1.28	2.68	1.8	1.1	108.81	1.39	1.28	58.67	41.33	16.48	418.2	4.2	0.03	1.24	2.27	0.9	1.11	108.47	1.35	1.24	59.08	40.92	17.66	435	4.1	0.03	1.2	3.09	2	1.12	107.27	1.32	1.2	59.41	40.59	18.01	428.1	4.05	0.03	9.5	8.5	10.53	10.6	5	0	1
12	s12	GE	3	1.02	3.26	4.3	1.21	99.65	1.2	1.02	61.59	38.41	21.42	385.2	3.72	0.03	1.02	3.49	0.2	1.16	103.59	1.16	1.02	60.82	39.18	21.84	389.2	3.68	0.03	1.05	1.93	2.5	1.17	102.58	1.22	1.05	60.96	39.04	20.99	398.9	3.79	0.03	9	10.5	-16.67	11.8	6	0	1
13	s13	GC	1	1.38	2.84	-0.7	0.97	123.58	1.32	1.38	57.66	42.34	14.9	436.7	4.22	0.03	1.27	3	-1	1.04	115.47	1.28	1.24	58.9	41.1	17.34	408.1	3.92	0.03	1.24	3.44	-1.6	1.04	114.85	1.28	1.24	59.01	40.99	17.24	397.1	3.88	0.04	8.5	9.2	-8.24	9	5	1	0
13	s13	GC	2	1.18	1.92	1.7	1.13	109.21	1.28	1.18	59.21	40.79	16.7	417.6	3.98	0.03	1.16	2.24	1.6	1.11	109.92	1.25	1.16	59.5	40.5	17.54	404	3.88	0.03	1.09	3.05	5	1.14	107.83	1.19	1.09	61.07	38.93	19.56	375.4	3.7	0.03	11.3	13	-15.04	11.2	6	0	0
13	s13	GC	3	1.31	2.54	0.71	1	122.01	1.18	1.41	58.22	42.07	15.95	420.93	4.23	0.02	1.28	2.51	-0.57	1.05	122.82	1.23	1.16	58.47	42.36	15.58	416.35	3.8	0.03	1.28	2.92	0.75	1.01	119.88	1.24	1.22	58.15	41.81	16.47	412.02	3.97	0.03	10.04	11.03	-9.86	10.92	4.73	0	0
14	s14	GC	1	1.38	3.06	2.8	0.89	134.9	1.18	1.34	58.75	41.25	18.5	481.1	4.18	0.03	1.36	3.09	3.1	0.9	133.77	1.14	1.29	58.92	41.08	19.02	469.1	4.04	0.03	1.37	2.74	3.3	0.9	134.23	1.17	1.32	58.57	41.43	18.36	475.9	4.14	0.03	9.7	13.6	-40.21	13.8	4	0	1
14	s14	GC	2	1.14	2.02	-6.6	0.99	121.21	1.13	1.15	60.04	39.96	21.38	432.6	3.77	0.02	1.21	1.72	-7.9	0.99	122.18	1.17	1.21	59.85	40.15	20.87	452.9	4	0.02	1.16	2.98	-3.2	0.99	121.75	1.13	1.16	59.52	40.48	20.18	438.1	3.81	0.02	11.3	10.3	8.85	10.6	7	1	2
14	s14	GC	3	1.22	2.34	-3.2	0.98	127.86	1.12	1.22	58.74	41.26	18.02	481.3	3.95	0.02	1.21	2.85	-4.5	0.94	127.5	1.12	1.21	58.67	41.33	19.2	459	3.96	0.02	1.26	2.67	-4.7	0.91	131.42	1.13	1.26	58.17	41.83	18.28	480.2	4.07	0.02	9.3	11.1	-19.35	13.6	4	0	1
15	s15	GE	1	1.48	3.18	1.1	0.93	129.12	1.35	1.47	57.77	42.23	15.93	386.3	4.24	0.04	1.39	2.53	2	0.95	126.49	1.3	1.38	58.32	41.68	17.66	371.4	4.06	0.04	1.38	2.95	-3.6	0.95	126.79	1.28	1.36	60.37	39.63	19.46	372.2	4.03	0.04	8.2	15.8	-92.68	9.8	4	0	1
15	s15	GE	2	1.47	2.26	-4.4	0.93	129.23	1.34	1.47	56.69	43.31	15.21	423.6	4.31	0.04	1.27	2.69	-4.3	0.98	122.67	1.23	1.27	58.16	41.84	18.07	384.1	3.88	0.04	1.18	3.14	-4.9	1	120	1.17	1.18	58.6	41.4	19.26	373.7	3.7	0.04	8.9	13.9	-56.18	9.7	6	0	1
15	s15	GE	3	1.34	1.6	-4.8	0.94	128.09	1.24	1.34	57.86	42.14	17.61	395.8	4.12	0.04	1.23	2.52	-5.3	0.98	123.03	1.19	1.23	58.46	41.54	19.19	374	3.85	0.04	1.26	3.31	-4.5	0.96	125.03	1.2	1.26	58.52	41.48	19.01	379.1	3.94	0.04	12.2	13.2	-8.2	10.9	6	2	3
16	s16	GE	1	1.73	3.68	6.1	0.85	140.77	1.38	1.66	55.89	44.11	14.17	490.5	5.06	0.04	1.6	3.28	5.3	0.89	135.63	1.27	1.47	57.44	42.56	16.88	439	4.55	0.04	1.57	2.94	4.2	0.9	133.29	1.3	1.48	57.91	42.09	17.47	433.4	4.57	0.03	6.7	9	-34.33	7.2	5	0	2
16	s16	GE	2	1.45	2.5	-7.2	0.89	135.31	1.25	1.45	56.31	43.69	15.7	458.3	4.5	0.02	1.34	1.88	-2.3	0.95	126.63	1.25	1.34	57.25	42.75	15.44	415.2	4.25	0.02	1.3	2.67	-9	0.93	129.42	1.18	1.3	57.44	42.56	18.47	427.8	4.2	0.02	8.9	9.6	-7.87	11.3	7	1	1
16	s16	GE	3	1.24	2.77	0.95	1.03	121.96	1.18	1.42	58.33	41.45	14.81	417.62	4.06	0.02	1.35	2.55	0.32	1	120.18	1.32	1.18	58.38	42.64	16.49	415.68	4.13	0.03	1.06	2.73	0.67	1.08	119.02	1.28	1.26	58.79	42.01	16.54	406.97	4.07	0.01	9.44	11.45	-21.29	10.79	5.43	0	0
17	s17	GC	1	1.63	1.72	-1.9	0.8	150.19	1.23	1.57	57.43	42.57	13.82	512.5	4.84	0.04	1.53	3.34	-2.6	0.82	147.23	1.23	1.53	58.98	41.02	16.82	494.8	4.7	0.04	1.46	2.64	-1.5	0.84	143.57	1.2	1.46	59.6	40.4	18.51	472	4.54	0.04	7.3	9.3	-27.4	9.4	4	3	2
17	s17	GC	2	1.21	2.65	0.73	0.99	125.63	1.34	1.33	57.47	43.01	14.87	424.16	3.97	0.02	1.39	2.5	-0.24	1	121.52	1.19	1.22	58.8	41.34	16.51	413.2	4.16	0.03	1.19	2.35	0.54	1	120.41	1.2	1.29	59.32	40.84	16.54	407.79	3.93	0.03	8.94	10.27	-14.88	10.58	5.05	1.55	1.64
17	s17	GC	3	1.13	2.96	0.03	0.96	122.57	1.33	1.33	57.73	41.57	15.52	421	4.19	0.02	1.23	2.48	0.58	1.04	120	1.18	1.3	57.7	41.8	15.05	417.57	4.07	0.03	1.42	2.57	-0.08	1.06	121.98	1.08	1.36	58	41.97	15.92	412.75	4.1	0.03	9.7	11.01	-13.51	10.93	4.36	0	0
18	s18	GC	1	1.16	2.32	-3	0.99	121.57	1.13	1.16	59.93	40.07	18.66	417.8	3.76	0.03	1.12	2.85	-2.5	1.01	119.19	1.12	1.12	60.31	39.69	19.47	409.4	3.66	0.03	1.01	1.99	-1.4	1.05	114.28	1.04	1	60.37	39.63	20.18	374	3.35	0.03	11.2	13.2	-17.86	14.7	5	0	0
18	s18	GC	2	1.15	2.38	2	1.03	123.79	1.07	1.15	60.47	39.53	17.73	441	3.83	0.03	1.14	1.74	-3.4	0.98	125.18	1.07	1.14	59.74	40.26	19.14	440.3	3.8	0.03	1.06	3.07	2.3	0.99	121.23	1.04	1.06	60.12	39.88	19.2	412.9	3.57	0.02	10.6	11.1	-4.72	12.4	6	0	0
18	s18	GC	3	1.05	3.63	0.5	0.95	126.92	0.98	1.05	58.63	41.37	17.09	415.8	3.54	0.03	1.03	2.29	0	0.97	123.15	0.99	1.03	58.78	41.22	17.48	419.1	3.48	0.03	1.01	2.48	-0.5	0.99	120.73	0.98	1.01	59.03	40.97	18.32	413.3	3.4	0.03	10.6	11.9	-12.26	11.3	6	0	2
19	s19	GC	1	1.57	2.28	6.8	0.89	134.27	1.36	1.54	55.4	44.6	13.72	440.2	4.53	0.02	1.45	3.27	5.3	0.93	129.63	1.27	1.39	56.69	43.31	15.6	422	4.18	0.03	1.32	2.48	5.6	0.97	124.16	1.26	1.31	56.56	43.44	15.47	397	4.02	0.04	10.5	10.4	0.95	10	2	3	2
19	s19	GC	2	1.26	2.86	-3.6	0.99	121.44	1.22	1.26	57.2	42.8	15.84	423	3.9	0.03	1.28	2.4	-4.7	0.98	123.02	1.23	1.28	55.96	44.04	13.9	406.1	3.95	0.03	1.2	2.84	-5.3	0.99	121	1.18	1.21	56.81	43.19	15.76	400.8	3.79	0.03	8.3	10.6	-27.71	9.1	3	2	3
19	s19	GC	3	1.37	2.39	0.86	1.06	121.68	1.31	1.34	58.52	41.8	15.55	419.97	4.09	0.03	1.29	2.83	-0.68	1.03	121.19	1.28	1.32	57.58	42.68	16.06	416.97	4.22	0.03	1.19	2.4	-0.97	0.99	120.31	1.16	1.25	58.53	42.03	16.68	405.39	4.27	0.02	10	11.28	-12.8	11.77	4.87	0	0
20	s20	GE	1	1.1	2.98	3.9	1.1	109.44	1.18	1.08	59.26	40.74	20.08	370.5	3.64	0.04	1.24	3.75	4.8	1.07	112.18	1.28	1.21	58.8	41.2	19.38	383.2	3.93	0.04	1.23	3.43	3.8	1.06	112.92	1.27	1.2	58.61	41.39	18.6	394.2	3.95	0.04	12.8	13.2	-3.12	14.2	5	1	2
20	s20	GE	2	1.27	2.81	2.2	1.03	116.48	1.3	1.27	57.76	42.24	16.29	427.4	4.17	0.03	1.15	2.38	-2.6	1.05	113.93	1.2	1.15	58.64	41.36	18.36	402.9	3.88	0.03	1.22	2.72	-2.6	1.03	116.04	1.25	1.22	58.23	41.77	17.52	413.3	4.01	0.03	9.7	9.8	-1.03	10.5	4	2	1
20	s20	GE	3	1.26	3.56	-1.4	1.02	118.25	1.26	1.26	57.2	42.8	15.21	438.8	4.22	0.03	1.25	1.89	-3	1	120.08	1.24	1.25	58.1	58.12	17.93	412.6	4.11	0.03	1.24	3.36	-2.8	1.02	118.27	1.24	1.24	57.97	42.03	17.13	423.9	4.16	0.03	9.7	9.9	-2.06	11	7	3	2
21	s21	GE	1	1.18	3.93	-2.9	1.04	115.83	1.19	1.16	61.04	38.96	20.73	322.2	3.71	0.03	1.1	2.87	-0.9	1.06	113.5	1.14	1.1	61.51	38.49	22.68	297.9	3.53	0.03	1.04	3.91	-1.8	1.09	110.02	1.11	1.03	61.99	38.01	23.16	288.6	3.38	0.03	13.3	14	-5.26	12.2	4	0	2
21	s21	GE	2	1.36	2.5	0.13	0.98	123.84	1.26	1.19	58.81	42.09	16.48	419.6	3.94	0.03	1.2	2.53	0.56	1.03	121.62	1.32	1.31	58.41	41.04	16.19	410.3	4.21	0.04	1.17	2.89	0.83	1.06	120.4	1.18	1.15	58.77	41.57	16.26	404.63	4.06	0.02	9.73	10.78	-10.79	10.22	4.68	1.34	1.72
21	s21	GE	3	1.26	2.5	1.65	1.05	122.12	1.28	1.24	58.39	41.42	15.93	418.96	4.23	0.03	1.32	3.01	0.76	0.98	122.9	1.32	1.37	57.99	42.04	15.38	413.1	4.2	0.03	1.29	2.77	-0.67	0.95	120.47	1.31	1.31	58.7	42.32	16.15	409.41	3.97	0.02	9.42	11	-16.77	11.41	4.87	0	0
22	s22	GE	1	1	3.45	3.2	1.13	106.36	1.09	0.98	60.89	39.11	23.06	336	3.32	0.03	1	3.15	3.9	1.14	105.77	1.06	0.95	61.44	38.56	24.19	332.3	3.26	0.03	0.97	2.9	2.6	1.16	103.68	1.05	0.92	61.83	38.17	24.57	325.2	3.19	0.03	11.9	13	-9.24	13	3.2	0	2
22	s22	GE	2	0.94	2.76	-3.8	1.13	105.96	1.05	0.94	60.46	39.54	22.4	302.1	3.14	0.03	0.94	3.45	-2.1	1.15	104.62	1.06	0.94	61.12	38.88	23.06	307.3	3.13	0.03	0.95	2.26	-0.1	1.13	104.62	1.07	0.95	61.33	38.67	22.41	322.5	3.24	0.03	11.2	12.2	-8.93	12	4.2	2	2
22	s22	GE	3	0.97	3.07	-1.3	1.12	107.01	1.09	0.98	61.35	38.65	22.19	338.1	3.39	0.02	1.02	2.7	-2.4	1.11	108.5	1.11	1.01	60.73	39.27	22.29	343.1	3.39	0.03	0.97	3.18	-2.2	1.12	105.71	1.08	0.97	61.5	38.5	23.02	330.5	3.33	0.03	12.8	13.1	-2.34	13.2	4.9	1	2
23	s23	GE	1	1.19	3.34	-0.8	0.96	125.12	1.11	1.17	56.99	43.01	13.43	425.8	3.65	0.03	1.17	2.02	0.7	0.96	124.59	1.08	1.13	56.71	43.29	13.71	425.6	3.54	0.03	1.16	2.3	1.2	0.96	124.44	1.1	1.15	56.78	43.22	14.03	418.7	3.57	0.03	11.4	14.6	-28.07	11.7	2	1	2
23	s23	GE	2	1.27	2.94	-0.38	0.98	124.09	1.23	1.16	58.54	41.49	16.53	425.34	4	0.03	1.29	2.55	-0.17	1.04	122.67	1.21	1.35	58.63	41.15	17.14	411.03	3.89	0.03	1.32	3.26	-0.91	1.02	121.46	1.24	1.14	58.22	41.64	16.25	408.97	4.25	0.02	8.6	9.4	-9.3	10.2	3	2	3
23	s23	GE	3	1.38	2.76	0.2	1.06	122.14	1.25	1.31	57.75	42.35	15.49	420.01	3.77	0.02	1.2	2.56	0.57	1.04	121.94	1.3	1.19	58.89	42.01	14.95	412.54	4.04	0.03	1.25	2.78	0	1.06	120.88	1.15	1.34	58.7	41.57	15.61	411.02	4.27	0.03	10.18	11.74	-15.32	10.97	5.21	0	0
24	s24	GE	1	1.18	1.63	3.3	0.98	122.87	1.14	1.17	56.57	43.43	14.47	366.2	3.65	0.03	1.11	1.99	1.4	1.03	116.86	1.11	1.09	57.67	42.33	15.92	368.4	3.49	0.03	1.04	3.06	1.5	1.05	114.72	1.09	1.04	57.87	42.13	16.29	352.8	3.38	0.03	10	11.8	-18	10.5	5	3	1
24	s24	GE	2	1.4	2.17	0.45	1.06	124.65	1.1	1.26	58.22	42.61	15.56	422.63	4.27	0.03	1.33	2.48	0.59	1.09	122.34	1.32	1.23	58.67	41.57	16.33	413.46	4.22	0.03	1.44	2.5	-0.08	1	119.68	1.21	1.27	59.05	40.58	17.66	408.5	4.17	0.02	9.42	11.13	-18.15	10.77	5.11	1.74	1.63
24	s24	GE	3	1.19	2.91	-0.13	1.03	123.28	1.41	1.16	57.44	41.99	15.4	421.85	4.24	0.03	1.32	2.58	-0.12	1.03	121.46	1.15	1.19	58.62	42.8	16.31	413.46	4	0.03	1.27	2.91	-0.36	0.99	121.55	1.38	1.3	57.75	42.68	16.56	410.71	3.88	0.03	10.53	11.32	-7.5	11.97	5.31	0	0
25	s25	GE	1	1.25	1.72	1.6	0.98	122.23	1.2	1.24	57.2	42.8	15.19	376.9	3.79	0.02	1.11	1.86	0.6	1.02	117.54	1.11	1.09	58.58	41.42	17.44	351.3	3.43	0.02	0.99	3.38	1	1.07	111.87	1.03	0.97	59.31	40.69	19.01	323.5	3.17	0.03	9	13.7	-52.22	9.2	4	0	0
25	s25	GE	2	1.31	2.8	0.39	1.02	123.61	1.3	1.27	58.28	41.86	15.57	424.07	4.22	0.03	1.16	2.23	-1.26	0.95	121.7	1.28	1.15	58.29	40.43	16.94	413.25	3.92	0.03	1.4	2.63	0.62	0.99	120.63	1.22	1.32	58.87	41.19	17.59	407.99	3.86	0.03	8.9	10.2	-14.61	9.1	2	0	1
25	s25	GE	3	1.28	2.38	-0.7	1.02	122.64	1.25	1.31	58.84	41.29	15.37	423.59	4.03	0.02	1.18	2.5	0.28	0.98	121.15	1.15	1.29	57.61	42.47	16.49	416.44	4.1	0.03	1.2	2.5	-0.54	1.04	121.03	1.23	1.37	58.27	41.43	17.89	414.34	4.01	0.02	14.2	18.3	-28.87	13.2	4.79	0	0
26	s26	GC	1	1.46	2.04	1.2	1	119.64	1.4	1.42	56.25	43.75	12.89	411.1	4.45	0.03	1.41	2.91	0.2	1.01	115.85	1.41	1.39	57.45	42.55	13.78	405	4.38	0.03	1.41	2.06	-2.3	1.06	116.77	1.4	1.39	57.4	42.6	13.36	407.6	4.36	0.03	9.98	11.73	-17.54	10.6	2	2	2
26	s26	GC	2	1.4	2.51	-1.1	1.02	117.96	1.41	1.4	56.96	43.04	14.47	413	4.41	0.03	1.37	1.63	0.7	1.01	116.2	1.39	1.36	57.97	42.03	14.42	413.1	4.35	0.03	1.35	1.7	0.5	1.02	115.37	1.39	1.35	58.1	41.9	14.74	408.3	4.29	0.02	8.5	8.5	0	9.2	2	3	2
26	s26	GC	3	1.37	2.52	-1.1	1.02	117.7	1.36	1.37	56.18	43.82	12.77	408.4	4.31	0.02	1.4	2.62	0.2	1.02	117.28	1.41	1.4	56.64	43.36	13.18	403.5	4.43	0.02	1.4	1.68	-0.3	1.02	117.95	1.4	1.4	56.47	43.53	13.21	408.9	4.41	0.02	8.4	9.2	-9.52	9.2	2	3	2
27	s27	GC	1	1.25	1.9	4.9	1.04	115.77	1.27	1.23	55.79	44.21	13.68	381.6	3.87	0.03	1.11	2.1	3.5	1.1	109.23	1.18	1.08	57.4	42.6	16.26	348.6	3.51	0.03	1.06	2.28	4.2	1.13	106.06	1.16	1.03	57.6	42.4	17.1	331.2	3.37	0.03	11.4	12.3	-7.89	11.4	4	0	1
27	s27	GC	2	1.18	2.39	-0.21	0.98	123.41	1.23	1.31	57.82	41.34	15.7	424.38	4.3	0.02	1.34	2.77	0.87	0.98	122.78	1.21	1.16	57.95	40.93	16.54	412.17	4.07	0.04	1.24	3.35	1.14	1.07	120.63	1.22	1.21	60.1	42.08	17.07	405.6	3.9	0.03	8.98	9.7	-8.02	10.9	5.24	1.48	1.82
27	s27	GC	3	1.27	2.77	-0.39	0.98	121.07	1.38	1.4	57.87	42.22	14.89	419.65	4.2	0.03	1.38	2.94	0.73	1.02	120.27	1.29	1.26	58.57	43.41	15.95	414.07	4.2	0.03	1.31	2.88	-0.14	1.01	120.56	1.11	1.23	58.58	41.6	15.49	412.1	4.24	0.02	8.73	10.5	-20.27	11.31	4.85	0	0
28	s28	GC	1	1.35	1.86	2.8	1.05	114.27	1.39	1.33	56.59	43.41	14.37	379.7	4.13	0.03	1.23	1.97	1.9	1.06	111.24	1.31	1.23	57.78	42.22	15.36	358.6	3.92	0.04	1.19	2.47	2.5	1.08	111.6	1.25	1.17	57.47	42.53	16.01	352	3.76	0.04	9.9	13.5	-36.36	10.5	6	0	0
28	s28	GC	2	1.33	2.59	-2.2	1.04	115.39	1.37	1.33	56.22	43.78	13.47	396.6	4.23	0.02	1.16	1.8	0.7	1.06	109.06	1.24	1.16	58.16	41.84	16.27	377.2	3.81	0.02	1.31	2.44	-1.5	1.03	116.81	1.34	1.31	56.68	43.32	14.21	405.2	4.24	0.02	9.8	10.1	-3.06	11.2	6	0	3
28	s28	GC	3	1.22	1.56	-2.8	1.06	112.9	1.27	1.22	56.44	43.56	14.17	374.4	4	0.02	1.28	1.42	-3.1	1.04	114.96	1.31	1.28	56.25	43.75	13.89	385.4	4.16	0.02	1.24	1.3	-3.6	1.03	116.82	1.25	1.24	56.48	43.52	14.53	382.9	4.09	0.02	11.8	11	6.78	12.5	7	2	3
29	s29	GE	1	1.3	2.08	-2	0.94	124.19	1.22	1.31	59.22	40.78	15.43	432.2	4.26	0.04	1.19	3.34	-2	0.99	117.99	1.11	1.13	61.33	38.67	18.49	400.7	3.97	0.04	1.25	2.84	-3.9	0.97	120	1.17	1.21	60.8	39.2	17.78	409.5	4.05	0.04	9.4	12.1	-28.72	10	4	0	2
29	s29	GE	2	1.32	3.02	5	0.94	128.22	1.22	1.32	62.29	37.71	18.94	466.9	4.3	0.02	1.26	2.46	15	0.99	121.61	1.22	1.26	63.77	36.23	21.51	480.6	4.14	0.02	1.21	2.35	16.9	1	119.53	1.2	1.21	64.32	35.68	22.09	493.8	3.98	0.01	9.7	10.3	-6.19	10.5	7	1	3
29	s29	GE	3	1.35	2.45	-0.1	1.02	123.16	1.33	1.18	57.94	41.98	15.44	419.68	4.12	0.03	1.29	2.56	-0.21	1.09	122.1	1.23	1.28	57.79	42.04	15.8	418.35	4.33	0.03	1.44	2.38	0.44	1.08	121.71	1.23	1.25	58.09	41.3	17.58	411.06	4.27	0.03	10.29	10.89	-5.83	11.01	4.41	0	0
30	s30	GC	1	1.28	1.6	1.4	0.97	119.86	1.25	1.28	58.49	41.51	17.18	416.2	4.14	0.04	1.24	2.31	3.4	0.98	120.13	1.25	1.26	58.13	41.87	16.49	410.9	3.98	0.04	1.04	3.71	2.4	1.1	109.13	1.13	1.03	59.07	40.93	19.86	371.7	3.5	0.04	9	14.1	-56.67	10.3	4	0	2
30	s30	GC	2	1.21	2.23	1.02	0.94	124.54	1.35	1.34	57.86	42.59	15.59	421.33	4.03	0.02	1.34	2.98	0.73	0.99	122.74	1.28	1.14	59.15	41.7	16.16	409.45	3.73	0.03	1.25	2.72	-0.04	1.06	118.91	1.42	1.25	58.97	40.6	16.36	407.04	4.08	0.03	9.4	10.69	-13.72	10.26	5.08	1.65	1.99
30	s30	GC	3	1.34	2.23	-0.19	0.98	120.63	1.19	1.3	58.19	42.6	16.59	423.5	4.22	0.03	1.42	2.87	-0.05	1.1	122.43	1.18	1.29	58.13	42.26	16.92	414.65	4.5	0.03	1.4	2.56	-0.41	1	121.69	1.31	1.27	58.21	41.63	17.83	411.56	4.39	0.03	10.4	10.79	-3.75	11.58	4.45	0	0
31	s31	GC	1	1.3	2.12	0	1.04	112.82	1.3	1.25	59.8	40.2	18.26	374.4	4.04	0.03	1.12	1.58	-0.1	1.09	107.46	1.27	1.15	60.43	39.57	19.99	324.2	3.75	0.02	1.24	1.42	0.3	1.08	111.33	1.3	1.22	59.73	40.27	19.4	369.7	3.9	0.03	13.4	17.6	-31.34	16.2	2	1	1
31	s31	GC	2	1.26	0.87	-0.4	1.03	115.96	1.29	1.26	58.61	41.39	17.31	388.5	4	0.02	1.2	1.91	-1.3	1.04	113.84	1.25	1.2	60.03	39.97	19.26	381.3	3.92	0.02	1.26	2.88	1.2	1.05	114.68	1.3	1.26	59.32	40.68	18.06	396.6	4.07	0.02	11.2	10.4	7.14	14.4	2	2	3
31	s31	GC	3	1.34	2.43	-0.51	1.05	123.67	1.35	1.35	58.14	42.44	15.23	420.72	4.47	0.02	1.35	1.98	-0.25	1.02	120.64	1.16	1.27	57.33	43.48	17.1	412.95	4.15	0.03	1.39	2.25	0.05	1.06	121.02	1.31	1.16	58.38	42.24	17.07	413.66	4.04	0.03	9.41	10.77	-14.45	11.18	5.32	0	0
32	s32	GE	1	1.28	3.08	3.3	1.02	117.65	1.25	1.24	57.88	42.12	17.13	430.5	3.9	0.03	1.23	2.51	2.1	1.05	114.34	1.25	1.2	58.62	41.38	18.11	413.9	3.75	0.03	1.21	3.41	2.6	1.04	115.18	1.23	1.2	58.42	41.58	17.89	421.1	3.74	0.03	10.6	12	-13.21	11.4	7	0	2
32	s32	GE	2	0.87	3.99	10.5	1.13	106.42	0.97	0.87	64.5	35.5	25.17	398.4	3.27	0.02	0.87	3.99	10.5	1.13	106.42	0.97	0.87	64.5	35.5	25.17	398.4	3.27	0.02	0.83	3.76	12.4	1.19	103.15	0.94	0.83	65.6	34.4	26.44	401.5	3.24	0.02	15.5	16.4	-5.81	18.1	4.33	1	0
32	s32	GE	3	1.4	2.94	0.15	1.04	123.6	1.32	1.42	58.24	41.59	15.55	420.81	4.05	0.03	1.22	2.46	0.48	1.06	121.79	1.31	1.28	58.2	42.61	16.85	412.03	4.04	0.03	1.35	2.41	-0.34	1.03	119.58	1.23	1.34	58.36	41.37	16.55	412.44	3.97	0.03	9.96	12.08	-21.29	10.45	4.51	0	0
33	s33	GE	1	1.37	1.21	-1	0.94	127.1	1.3	1.39	57.99	42.01	15.61	395.2	4.29	0.03	1.27	1.61	0.3	0.96	125.27	1.21	1.27	58.37	41.63	16.95	379.7	3.92	0.03	1.35	1.13	0.2	0.94	127.31	1.27	1.35	58.22	41.78	16.59	390.2	4.15	0.03	10.2	10.5	-2.94	10.6	5	3	3
33	s33	GE	2	1.37	1.72	0	0.94	126.96	1.28	1.37	56.97	43.03	13.9	412.1	4.31	0.03	1.24	1.4	0.6	0.97	123.45	1.2	1.24	58.02	41.98	15.8	392.1	3.97	0.03	1.25	1.69	-0.1	0.97	123.93	1.2	1.25	57.76	42.24	15.56	384	3.96	0.03	10	11.1	-11	10.7	7	3	3
33	s33	GE	3	1.29	1.36	1.3	0.94	128.02	1.19	1.29	57.38	42.62	14.17	406.9	4.13	0.03	1.27	2.97	0.7	0.95	126.99	1.18	1.27	57.76	42.24	15.09	396.5	4.08	0.03	1.26	2.1	0.2	0.95	125.93	1.18	1.26	57.93	42.07	15.65	388.5	4.02	0.03	10.2	12.2	-19.61	11.4	8	3	3
34	s34	GE	1	1.26	1.95	4.4	1.04	114.33	1.26	1.23	56.62	43.38	14.14	397.3	3.82	0.03	1.16	2.46	1.7	1.1	108.98	1.23	1.14	56.91	43.09	14.52	371.8	3.59	0.04	1.11	3.98	0.6	1.11	108.11	1.19	1.1	57.43	42.57	14.83	365.4	3.48	0.03	11.6	16.8	-44.83	13.4	2	2	3
34	s34	GE	2	1.32	2.35	-1.3	0.97	123.7	1.24	1.32	55.82	44.18	12.3	429.5	4.05	0.03	1.27	2.37	0.3	0.98	122.01	1.23	1.27	56.45	43.55	12.78	426.6	3.96	0.02	1.22	2.82	-1.8	1.01	118.3	1.2	1.22	55.91	44.09	12.59	394.8	3.79	0.02	9.5	10.5	-10.53	10.9	4	3	3
34	s34	GE	3	1.22	2.24	2	1.02	114.4	1.23	1.23	57.75	42.25	14.52	419.7	3.93	0.04	1.33	3.22	0	1.01	118.51	1.32	1.33	56.14	43.86	12.26	426.8	4.11	0.03	1.3	1.84	0.3	1.02	117.36	1.3	1.3	56.69	43.31	13.32	421.7	4.03	0.03	9.5	11.5	-21.05	11.3	4	3	3
35	s35	GC	1	1.39	1.34	-2.1	0.96	126.6	1.32	1.41	57.41	42.59	12.97	399	4.29	0.04	1.26	2.39	-1.6	0.99	121.25	1.23	1.26	56.88	43.12	14.51	357.5	3.94	0.03	1.3	2.24	-1.2	0.98	123.53	1.25	1.31	57.93	42.07	14.19	385.6	4.11	0.04	10.5	11.3	-7.62	10.8	4	3	1
35	s35	GC	2	1.28	2.19	0.05	1	122.95	1.14	1.36	58.88	41.7	15.57	422.97	4.35	0.03	1.09	2.68	0.48	1.01	122.41	1.19	1.17	58.29	40.8	16.42	414.45	4.19	0.04	1.15	2.95	0.81	1.01	119.7	1.11	1.18	58.1	42.07	16.97	405.81	3.99	0.04	8.59	10.5	-22.24	10.57	4.87	1.49	1.76
35	s35	GC	3	1.32	3.23	-0.32	1.04	123.75	1.33	1.17	57.59	41.63	16	421.16	4.36	0.03	1.34	2.42	-0.15	1.03	122.84	1.25	1.24	58.93	43.09	15.78	416.89	4.09	0.03	1.24	2.78	0.57	1	120.83	1.31	1.46	58.78	41.95	16.88	409.06	4.08	0.03	9.08	10.75	-18.39	11.1	5.5	0	0
36	s36	GC	1	1.4	4.12	-4.2	0.92	130.6	1.25	1.37	58.73	41.27	15.61	452.9	4.37	0.02	1.35	2.36	-3.3	0.9	131.51	1.25	1.38	59.15	40.85	15.62	463.8	4.41	0.01	1.39	4.19	-4.3	0.89	134.48	1.23	1.39	58.45	41.55	14.91	456.9	4.42	0.02	9.7	12.7	-30.93	10.3	7	0	1
36	s36	GC	2	1.43	1.79	6	0.91	131.3	1.28	1.43	58.82	41.18	15.02	460.8	4.57	0.01	1.35	2.24	4.7	0.92	131.21	1.2	1.35	58.72	41.28	15.24	465.1	4.41	0.02	1.34	7.15	5.1	0.93	129.64	1.22	1.34	59.32	40.68	16.23	450.7	4.38	0.01	9.4	11.6	-23.4	9.4	7	1	1
36	s36	GC	3	1.34	3.25	3.8	0.93	129.86	1.23	1.34	58.54	41.46	15.41	452.5	4.37	0.02	1.35	3.87	2.4	0.91	131.89	1.21	1.35	58.35	41.65	15.46	467.7	4.42	0.02	1.33	2.93	3.2	0.91	131.36	1.2	1.33	59	41	16.51	461	4.41	0.02	9.4	10.4	-10.64	10.5	7	0	1
37	s37	GE	1	1.22	3.42	1.8	1	119.64	1.2	1.22	57.68	42.32	16.02	368.6	3.73	0.03	1.32	3.08	2.6	0.98	122.6	1.23	1.28	56.98	43.02	14.81	377.5	3.85	0.04	1.24	2.85	0.4	1.03	116.69	1.2	1.2	57.79	42.21	15.69	361.8	3.69	0.03	10.7	9.7	9.35	12.3	2	2	1
37	s37	GE	2	1.26	3	-1.9	0.97	123.89	1.19	1.26	56.85	43.15	14.39	389.1	3.9	0.03	1.21	4.94	0.8	1.01	118.93	1.19	1.21	57.61	42.39	14.86	374.8	3.74	0.03	1.28	2.22	0.2	0.96	124.68	1.19	1.28	56.85	43.15	13.65	390.2	3.91	0.03	10.2	13.5	-32.35	12.3	4	2	2
37	s37	GE	3	1.38	2.48	-0.55	1.01	122.54	1.34	1.32	57.83	41.54	15.44	424.21	4.15	0.02	1.33	2.51	-0.49	1.07	123.32	1.36	1.18	57.63	41.86	16.39	415.11	4.32	0.02	1.27	2.51	0.04	0.98	121.41	1.18	1.23	59.04	41.62	18.55	407.52	4.19	0.03	9.94	10.07	-1.31	11.76	5.23	0	0
38	s38	GC	1	1.59	1.25	0.01	1.02	117.27	1.61	1.61	53.89	46.11	17.17	376.6	4.83	0.02	1.69	1.94	0.8	1.01	119.11	1.64	1.65	53.53	46.47	7.58	374.7	4.89	0.03	1.59	1.78	1.1	1.03	116.69	1.61	1.6	54.14	45.86	8.62	371.6	4.78	0.02	8.2	8.4	-2.44	9.3	2	2	2
38	s38	GC	2	1.62	1.98	1.1	0.98	123.03	1.54	1.62	54.8	45.2	9.1	381.5	4.81	0.03	1.64	2.67	0.5	0.98	122.8	1.56	1.64	54.59	45.41	8.71	384	4.89	0.03	1.61	1.79	2	1	119.87	1.58	1.61	55.08	44.92	9.07	372.7	4.83	0.03	8	9.5	-18.75	8.9	4	3	1
38	s38	GC	3	1.69	2.1	-3.3	0.98	121.95	1.63	1.69	54.35	45.65	8.85	391.6	4.97	0.03	1.69	2.71	-2.7	0.99	120.65	1.65	1.69	54.15	45.85	8.27	392.5	5.02	0.03	1.72	1.54	-0.6	0.98	121.94	1.66	1.72	54.14	45.86	8.36	395.7	5.1	0.03	7	7.7	-10	8.3	3	3	3
39	s39	GE	1	1.33	3.39	0.3	0.99	120.99	1.29	1.32	59.16	40.84	18.32	374.1	4.18	0.03	1.31	2.78	-1.1	1	119.58	1.27	1.29	59.54	40.46	18.65	360.7	4.09	0.03	1.28	2.5	-0.8	0.99	121.45	1.27	1.3	59.63	40.37	18.88	378.7	4.18	0.03	9.2	8.5	7.61	9.7	5	1	1
39	s39	GE	2	1.34	2.37	-0.6	0.98	122.23	1.29	1.34	58.78	41.22	17.82	361.6	4.25	0.03	1.24	3.04	1.1	0.99	121.01	1.2	1.24	59.76	40.24	19.01	384.4	4.1	0.02	1.11	2.7	1.9	1.05	113.97	1.13	1.11	60.87	39.13	21.12	353.4	3.69	0.03	8.3	8.4	-1.2	9.1	7	2	2
39	s39	GE	3	1.31	2.46	3	1	120.52	1.27	1.31	59.08	40.92	16.86	401.9	4.2	0.03	1.25	2	2.7	1.01	118.36	1.24	1.25	59.66	40.34	18.27	382.4	4.06	0.03	1.21	2.24	2.7	1.01	118.5	1.19	1.21	60.19	39.81	19.23	380.5	3.96	0.03	7.8	7.7	1.28	9.4	7	3	2
40	s40	GE	1	1.04	2.62	-0.3	1.13	103.99	1.23	1.07	57.99	42.01	15.32	370.2	3.59	0.05	0.99	6.71	-3.8	1.18	102.51	1.14	0.99	57.76	42.24	16.71	347	3.22	0.04	0.91	2.42	-2.6	1.22	98.65	1.1	0.91	57.77	42.23	16.56	323.4	3.02	0.04	12.8	23.4	-82.81	14.1	6	1	3
40	s40	GE	2	1.29	2.34	0.47	0.99	123.57	1.24	1.29	58.23	42.72	15.64	425.12	4.22	0.03	1.21	2.09	0.56	0.92	122.44	1.14	1.2	58.63	41.59	16.99	415.4	3.95	0.03	1.22	2.61	1.02	1.04	120.55	1.18	1.29	58.43	41.23	15.38	407.77	3.9	0.03	9.94	10.93	-9.96	10.02	4.65	2.09	2.3
40	s40	GE	3	1.11	2.47	0.01	1.03	122.28	1.3	1.14	58.83	41.69	16.23	418.41	4.28	0.02	1.35	2.69	-0.33	1	121.84	1.29	1.32	58.36	42.09	15.95	417.18	4.05	0.03	1.24	3.03	0.11	0.95	120.47	1.32	1.19	58.66	42.47	16.49	406.83	4.1	0.03	9.69	11.47	-18.37	11.2	4.66	0	0
41	s41	GC	1	1.22	2.05	3.9	0.97	123.7	1.17	1.21	60.67	39.33	22.8	427.4	3.89	0.03	1.18	3.29	3.2	0.99	121.57	1.12	1.15	61.42	38.58	24.06	410.6	3.71	0.03	1.18	2.75	2.8	0.97	123.96	1.14	1.18	61.18	38.82	23.56	404.1	3.78	0.03	10	11.7	-17	12.3	7	1	1
41	s41	GC	2	1.34	2.45	-6.3	0.87	138.17	1.14	1.34	58.2	41.8	18.91	433.5	4.21	0.03	1.23	2.42	-8.2	0.91	131.37	1.11	1.23	58.6	41.4	20.42	383.2	3.95	0.03	1.16	2.1	-7.9	0.92	130.26	1.05	1.16	58.8	41.2	20.76	391.4	3.76	0.03	8.8	10.3	-17.05	12	7	3	2
41	s41	GC	3	1.26	2.22	-6.3	0.89	135.03	1.09	1.25	61.22	38.78	19.92	436.8	4.17	0.03	1.16	3.44	-4.5	0.95	126.65	1.07	1.14	61.84	38.16	21.87	400	3.82	0.03	1.02	3.44	-2.1	0.99	121.04	1.06	1.08	61.19	38.81	21.68	369	3.64	0.03	8.5	10.7	-25.88	10	6	0	0
42	s42	GE	1	1.06	2.32	-0.3	0.98	118.63	1.02	1.03	63.04	36.96	23.61	364.4	3.49	0.03	0.93	2.05	-2.5	1.02	115.76	0.97	0.95	63.3	36.7	24.89	345.5	3.24	0.03	0.92	4.01	-1.3	1.06	113.34	0.95	0.91	63.12	36.88	25.72	331.6	3.11	0.03	15.2	16.6	-9.21	16	6	0	0
42	s42	GE	2	1.07	2.65	-2.3	0.93	126.2	1	1.07	61.45	38.55	22.49	365.5	3.69	0.03	1	2.91	-0.5	0.95	123.81	0.95	1	62.06	37.94	23.56	360.4	3.51	0.03	0.93	2.92	3.9	0.99	120.65	0.92	0.93	62.69	37.31	23.86	335.6	3.3	0.03	13.2	13.1	0.76	14.7	7	1	2
42	s42	GE	3	1.2	2.35	0.06	0.96	121.9	1.32	1.43	57.14	41.75	15.35	422.34	4.17	0.02	0.93	2.77	11.2	0.96	125.57	0.87	0.93	62.09	37.91	19.68	369.5	3.35	0.04	0.91	2.63	2	1.07	119.28	0.88	0.92	62.83	37.17	28.3	353.8	3.27	0.04	15.5	16.7	-7.74	17.2	7	0	1
43	s43	GE	1	1.36	2.96	0.9	0.95	126.03	1.27	1.35	57.01	42.99	14.41	416.2	4.1	0.03	1.33	3.06	0.2	0.97	124.04	1.23	1.28	57.4	42.6	14.82	394.7	3.94	0.03	1.3	3.05	0.1	0.98	122.8	1.23	1.26	57.98	42.02	16.07	396.1	3.92	0.03	9.4	10.5	-11.7	10.9	3	0	2
43	s43	GE	2	1.32	3.76	0.1	0.98	122.54	1.28	1.32	56.75	43.25	13.39	416.1	4.05	0.03	1.22	2.71	1.2	1.02	118.17	1.23	1.22	57.96	42.04	15.25	394.3	3.87	0.03	1.24	2.79	1.1	1.02	118	1.26	1.25	57.85	42.15	15.14	409.9	3.91	0.02	8.8	10.6	-20.45	11.5	6	0	2
43	s43	GE	3	1.25	2.93	0.7	1	120	1.24	1.25	57.27	42.73	14.26	410.8	3.96	0.03	1.29	1.84	-1.2	0.98	122.31	1.25	1.29	56.94	43.06	14.38	410.9	4.03	0.03	1.22	1.77	-0.1	0.99	118.65	1.21	1.22	57.71	42.29	14.53	403.9	3.9	0.03	8.8	11.3	-28.41	9.4	6	1	3
44	s44	GC	1	1.14	2.77	-0.9	1.06	113.36	1.2	1.14	59.67	40.33	19.73	385.3	3.57	0.03	0.99	2.82	-1.3	1.14	105.83	1.11	0.99	60.92	39.08	22.56	346.5	3.18	0.03	0.98	4.64	-0.3	1.13	106.75	1.1	0.98	61.23	38.77	22.64	345.2	3.18	0.03	11.6	19.4	-67.24	14.3	6	2	2
44	s44	GC	2	1.23	2.35	0.11	1.05	123.58	1.28	1.23	58.64	41.53	15	424.85	3.85	0.03	1.26	2.57	0.49	1.01	120.15	1.25	1.27	58.44	41.39	17.57	413.35	3.89	0.03	1.3	2.94	0.38	1.04	120.94	1.28	1.18	58.96	41.19	17.04	406.48	4.12	0.03	8.93	10.3	-15.34	11.2	4.14	1.43	2.16
44	s44	GC	3	1.24	2.44	0.23	1	123.84	1.27	1.31	58.55	41.49	16.4	424.83	3.95	0.02	1.36	2.62	-0.57	1.06	122.98	1.2	1.23	58.52	42.91	15.86	411.44	3.92	0.03	1.39	3.09	-0.75	1.01	120.9	1.19	1.37	58.41	40.93	16.24	410.11	4.09	0.02	8.3	9.2	-10.84	8.1	4.58	0	0
45	s45	GE	1	1.22	3.05	3	0.94	125.96	1.16	1.23	57.08	42.92	14.46	376.6	3.82	0.03	1.19	2.66	2.2	0.95	123.24	1.13	1.18	57.35	42.65	15.02	371	3.68	0.03	1.15	5.89	2.6	1	120.27	1.12	1.13	57.28	42.72	15.31	348.3	3.58	0.04	8.33	12.2	-46.46	9.3	2	0	0
45	s45	GE	2	1.24	2.37	-1.6	0.92	130.76	1.12	1.24	56.45	43.55	13.42	401.7	3.86	0.03	1.31	3.63	-2.5	0.9	133.94	1.16	1.31	56.24	43.76	13.59	414.9	4.02	0.03	1.19	3.15	-2.7	0.96	124.9	1.12	1.19	56.91	43.09	14.93	385	3.72	0.03	8.4	10.2	-21.43	10.2	5	3	0
45	s45	GE	3	1.21	2.38	-1.5	0.94	128.49	1.11	1.21	56.74	43.26	13.81	385.7	3.83	0.03	1.18	3.13	-1.9	0.94	127.19	1.1	1.18	57.11	42.89	14.86	395.7	3.76	0.03	1.26	2.58	0	0.93	128.75	1.16	1.26	56.9	43.1	13.89	401.9	3.94	0.03	9.38	10.83	-15.46	11	2	2	1
46	s46	GE	1	1.39	2.49	-5.6	0.99	120.78	1.41	1.43	58.22	41.78	13.99	372.7	4.38	0.03	1.28	2.88	-7	1.01	118.7	1.33	1.32	59.99	40.01	17.21	348.6	4.12	0.03	1.16	2.38	-6.6	1.08	111.59	1.29	1.2	60.3	39.7	17.95	321.7	3.83	0.03	8.9	13	-46.07	12.4	2	1	1
46	s46	GE	2	1.46	2.34	3	0.97	123.36	1.4	1.46	57.53	42.47	13.59	410.8	4.55	0.03	1.43	2.93	3.8	0.99	121.49	1.4	1.43	57.91	42.09	14.36	399.2	4.51	0.03	1.3	2.34	4.5	1.02	117.8	1.3	1.3	58.91	41.09	16.17	366.7	4.12	0.02	8.5	11.5	-35.29	9.6	2	2	3
46	s46	GE	3	1.47	4.52	4.8	0.98	119.89	1.44	1.47	59.05	40.95	14.68	401.7	4.69	0.03	1.33	4.16	5.1	1.01	119.21	1.31	1.33	59.62	40.38	17.43	369	4.27	0.02	1.32	3.61	3.3	1.04	115.66	1.34	1.32	59.19	40.81	17.03	352.9	4.16	0.02	7.7	9.1	-18.18	10.6	5	3	2
47	s47	GC	1	1.46	1.81	0.9	0.97	126.25	1.23	1.35	57.47	42.53	12.82	474.6	4.39	0.03	1.32	3.25	0.6	0.99	121.37	1.23	1.26	57.17	42.83	14.7	414.3	4.11	0.03	1.35	2.44	1.1	0.97	124.15	1.26	1.34	56.52	43.48	13.46	436.4	4.28	0.04	10	17.2	-72	11.4	3	0	2
47	s47	GC	2	1.47	2.38	3	0.91	132.7	1.28	1.47	58.08	41.92	14.88	495.8	4.71	0.01	1.32	1.9	2.5	0.96	124.81	1.24	1.32	58.66	41.34	16.24	442.3	4.29	0.02	1.23	2.33	1	0.98	121.84	1.19	1.23	58.34	41.66	16.09	408.8	3.99	0.02	8.5	11	-29.41	10.1	4	2	3
47	s47	GC	3	1.49	2.64	1.17	1.06	122.15	1.31	1.42	57.41	41.71	16.04	421.95	4.1	0.02	1.27	2.51	-0.18	1.07	122.2	1.29	1.19	58.64	42.56	15.71	416.71	3.86	0.03	1.28	2.66	0.43	1.06	119.91	1.19	1.24	59.25	41.68	16.79	408.94	3.83	0.03	9.35	10.93	-16.9	10.82	4.67	0	0
48	s48	GC	1	1.4	1.39	6.8	0.99	121.46	1.4	1.42	57.38	42.62	17.45	412.8	4.52	0.03	1.46	2.73	4.7	0.97	124.1	1.42	1.48	58.31	41.69	18.74	412.5	4.6	0.04	1.41	2.52	6	0.97	123.3	1.37	1.42	57.86	42.14	18.13	410.4	4.5	0.04	9.4	11	-17.02	10.3	5	2	3
48	s48	GC	2	1.42	2.16	-6.2	0.95	124.07	1.35	1.42	58.18	41.82	17.59	424.1	4.61	0.04	1.51	2.16	-6.6	0.94	127.49	1.4	1.51	56.68	43.32	15.93	443.1	4.71	0.04	1.3	2.31	-3	1.02	117.71	1.32	1.3	57.36	42.64	15.87	406	4.21	0.03	8.2	8.4	-2.44	8.9	2	3	3
48	s48	GC	3	1.42	2.33	0.5	0.98	122.71	1.38	1.42	59.7	40.3	19.12	441.4	4.47	0.03	1.48	2.65	0.8	0.94	127.19	1.38	1.48	59.54	40.46	18.86	451.8	4.63	0.04	1.41	2.19	-1.7	0.98	122.28	1.37	1.41	59.85	40.15	20.4	434.2	4.46	0.03	7.6	8.8	-15.79	8.6	3	3	2
49	s49	GE	1	1.19	5.46	1	1.04	115.6	1.24	1.21	58.84	41.16	17.75	340.9	3.72	0.03	1.12	2.92	0.3	1.06	110.44	1.16	1.09	59.43	40.57	16.67	319.2	3.55	0.03	1.23	2.54	-0.3	1.04	115.13	1.25	1.21	58	42	15.61	343.1	3.75	0.03	10.6	14.9	-40.57	13.5	2	0	2
49	s49	GE	2	1.25	3.84	-0.5	1.02	117.98	1.25	1.25	56.91	43.09	14.08	346.5	3.83	0.03	1.27	5.06	2.1	1.02	118.05	1.27	1.27	56.82	43.18	12.59	358.5	3.92	0.03	1.3	5.22	0.8	0.99	120.97	1.27	1.3	56.57	43.43	12.54	370.2	3.99	0.03	7.9	11.5	-45.57	10.2	3	3	2
49	s49	GE	3	1.29	2.95	0.39	1.01	122.52	1.29	1.24	57.08	42.05	16.02	420.6	4.46	0.01	1.32	3.01	0.56	0.99	121.88	1.18	1.32	58	43.14	15.91	417.83	4.1	0.03	1.29	2.75	-0.96	1.06	119.4	1.2	1.28	57.82	41.92	16.24	412.9	4.14	0.02	9.6	10.96	-14.17	11.53	5.24	0	0
50	s50	GE	1	1.4	2.23	0.1	0.98	121.83	1.37	1.42	57.49	42.51	15.09	409.6	4.36	0.04	1.3	2.56	1	0.99	120.86	1.35	1.39	58.31	41.69	16.26	399.9	4.3	0.04	1.21	2.39	3.4	1	116.87	1.27	1.27	59.33	40.67	18.61	370.7	4.03	0.04	8.5	10	-17.65	10.5	2	3	3
50	s50	GE	2	1.55	2.7	2.3	0.95	125.99	1.43	1.55	57.37	42.63	13.66	472.2	4.75	0.03	1.52	2.79	1.9	0.92	130.9	1.35	1.52	57.92	42.08	15.12	465.1	4.72	0.03	1.45	2.19	0.5	0.94	127.12	1.33	1.45	57.62	42.38	15.02	451.5	4.53	0.03	7.8	8.6	-10.26	10	2	3	3
50	s50	GE	3	1.42	3.2	1.3	0.93	129.86	1.27	1.42	58.42	41.58	17.5	469.4	4.54	0.02	1.38	5.13	0.1	0.97	123.66	1.3	1.38	58.17	41.83	16.35	453.5	4.41	0.03	1.45	3.13	0.1	0.93	129.74	1.3	1.45	58.12	41.88	16.16	463.5	4.52	0.03	7.9	10	-26.58	9.9	1	3	2
51	s51	GE	1	1.54	1.54	-0.6	0.87	137.25	1.35	1.57	56.5	43.5	12.74	502.3	4.65	0.04	1.53	1.87	-0.4	0.9	133.78	1.34	1.51	56.21	43.79	12.35	480.4	4.56	0.04	1.55	2.2	-2.8	0.9	134.56	1.3	1.48	57.42	42.58	13.2	487.7	4.5	0.03	8.5	14.8	-74.12	9.5	4	2	2
51	s51	GE	2	1.4	1.76	2.4	0.87	138.11	1.18	1.4	57.1	42.9	13.12	481.4	4.44	0.03	1.35	3.32	2.1	0.92	130.13	1.22	1.35	57.94	42.06	14.9	460.5	4.35	0.02	1.34	2.32	1.2	0.92	130.55	1.2	1.34	57.38	42.62	14.15	458.6	4.27	0.02	7.1	10.1	-42.25	8.4	5	3	1
51	s51	GE	3	1.35	1.88	0.2	1	121.74	1.32	1.14	57.74	41.7	14.57	421.74	4.09	0.02	1.37	2.04	0.07	1.03	122.26	1.19	1.33	58.82	41.86	15.07	414.89	4.15	0.03	1.28	2.55	-0.3	1	120.67	1.31	1.31	58.09	42.37	17.47	412.77	4.08	0.02	9.81	10.56	-7.65	11.62	5.09	0	0
52	s52	GE	1	1.37	3.16	1.3	0.98	122.71	1.32	1.37	56.76	43.24	13.87	416.6	3.99	0.03	1.37	2.56	-0.4	0.99	121.37	1.22	1.26	57.48	42.52	14.69	407.2	3.79	0.03	1.39	2.53	0.4	0.97	124.1	1.32	1.39	56.79	43.21	13.61	413.8	3.99	0.02	10.3	11.3	-9.71	11	2	3	3
52	s52	GE	2	1.41	1.51	2	0.94	127.77	1.28	1.42	57.23	42.77	13.69	456.9	4.28	0.01	1.27	2.5	0.9	0.94	127.43	1.16	1.27	57.3	42.7	14.16	448.2	3.88	0.02	1.41	2.25	-0.6	0.94	128.12	1.28	1.41	56.96	43.04	14.27	460.9	4.27	0.02	8.2	9.4	-14.63	9.6	5	3	3
52	s52	GE	3	1.34	2.42	0.9	0.98	122.48	1.27	1.34	57.01	42.99	13.51	436.5	4.02	0.02	1.41	2.45	0.9	0.96	125.59	1.31	1.41	56.61	43.39	12.76	443.2	4.2	0.02	1.44	2.32	0	0.94	127.24	1.32	1.45	56.28	43.72	12.41	447.2	4.29	0.02	9	10.8	-20	11.3	5	0	3
53	s53	GE	1	1.51	3.22	0.3	0.89	135.74	1.3	1.49	55.99	44.01	12.18	464.1	4.52	0.04	1.35	3.26	-0.8	0.94	127.72	1.25	1.34	57.43	42.57	14.49	446.7	4.18	0.04	1.38	3.87	-1.3	0.92	130.69	1.24	1.36	56.97	43.03	13.27	438.2	4.21	0.03	9.4	13.1	-39.36	9	6	2	2
53	s53	GE	2	1.47	3.19	-0.4	0.88	137.3	1.27	1.47	56.48	43.52	12.99	477.9	4.48	0.03	1.38	3.31	0.3	0.92	131.14	1.25	1.39	57.25	42.75	14.23	448.6	4.28	0.03	1.36	2.5	0.8	0.91	131.98	1.22	1.36	57.12	42.88	13.98	434.1	4.2	0.03	8	10.6	-32.5	8.7	6	2	3
53	s53	GE	3	1.45	3.27	0.6	0.88	136.47	1.25	1.45	55.68	44.32	11.35	518.1	4.6	0.03	1.36	2.02	2.3	0.91	132.32	1.22	1.36	56.45	43.55	12	485.8	4.35	0.03	1.31	2.58	0.6	0.92	130.07	1.19	1.31	56.83	43.17	13.4	465.5	4.18	0.03	8.9	12.2	-37.08	10.4	3	3	1
54	S54	GC	1	1.34	2.58	5.1	0.96	121.87	1.29	1.34	58.14	41.86	16.05	361.3	4.14	0.04	1.31	2.17	-0.8	0.99	121.29	1.27	1.3	58.05	41.95	15.66	364.4	3.99	0.03	1.33	3.11	0.3	1	120.47	1.23	1.25	57.64	42.36	15.37	356.9	3.85	0.03	9.4	10.9	-15.96	9.3	5	2	1
54	S54	GC	2	1.41	2.52	0.24	0.99	122.85	1.35	1.38	58.44	41.51	15.43	424.25	4.23	0.02	1.25	2.78	0.68	1.01	120.06	1.17	1.19	58.68	41.64	16.93	413.63	4.31	0.04	1.22	2.76	0.03	1.01	119.23	1.32	1.23	58.39	41.08	18.23	404.36	3.89	0.02	9.16	10.94	-19.43	10.98	4.79	1.59	1.88
54	S54	GC	3	1.29	2.23	0.46	0.98	121.43	1.3	1.31	58.29	41.6	15.35	420.4	4.03	0.02	1.36	2.8	0.45	1.03	121.16	1.22	1.3	58.07	42.07	15.6	416.64	4.13	0.03	1.18	2.31	-1.07	1	120.63	1.27	1.32	58.11	41.75	16.19	407.57	4.14	0.02	9.53	11.47	-20.36	11.46	4.84	0	0
55	s55	GC	1	1.31	3.05	-3.4	0.94	128.5	1.24	1.34	59.27	40.73	14.83	476.2	4.21	0.02	1.17	1.91	-4.4	1	119.63	1.16	1.16	60.25	39.75	18.7	437.5	3.79	0.03	1.03	3.65	-4.5	1.06	113.2	1.12	1.06	61.01	38.99	20.04	407.1	3.52	0.03	8.2	14.5	-76.83	9.8	2	1	1
55	s55	GC	2	1.33	2.7	3.7	0.93	126.45	1.25	1.33	59.74	40.26	16.74	460	4.28	0.03	1.22	2.27	4.3	0.97	123.09	1.18	1.22	59.66	40.34	17.47	426.5	3.98	0.03	1.18	3.47	5.3	1.02	120.23	1.17	1.18	61	39	18.97	437.1	3.84	0.03	8.6	10.3	-19.77	9.4	4	1	3
55	s55	GC	3	1.22	2.37	3.3	0.96	125.04	1.16	1.22	59.5	40.5	17.57	436.6	3.95	0.03	1.2	3.08	4.1	0.98	121.91	1.17	1.2	59.8	40.2	17.96	438.1	3.92	0.03	1.08	3.01	5	1.03	116.73	1.1	1.08	61.06	38.94	19.97	420.7	3.62	0.02	9.2	10.2	-10.87	11.3	4	1	2
56	s56	GE	1	1.13	2.29	2.5	1.05	113.85	1.17	1.12	58.07	41.93	17.1	363	3.58	0.02	1.09	2.09	1.9	1.07	110.6	1.15	1.08	58.87	41.13	17.65	352.2	3.51	0.02	0.94	2.73	0.5	1.16	103.4	1.08	0.94	59.81	40.19	19.79	312.5	3.11	0.02	14.4	19.1	-32.64	18.7	6	0	0
56	s56	GE	2	1.29	2.26	0.08	1.03	125.34	1.31	1.21	59.01	41.42	14.92	419.61	4.37	0.02	1.31	2.49	-0.96	1.01	121.35	1.29	1.08	58.09	41.86	16.64	408.91	4.2	0.03	1.3	2.32	0.81	1.03	122.71	1.21	1.21	59.17	41.95	17.37	405.74	3.9	0.03	9.15	9.99	-9.18	11.22	5.06	1.23	1.38
56	s56	GE	3	1.34	2.51	-1.5	1.01	121.31	1.04	1.37	57.8	41.98	15.45	422.81	4.1	0.03	1.19	2.3	0.75	1	121.88	1.27	1.23	57.68	41.98	17.29	415.51	4.02	0.03	1.39	3.14	-0.05	1.01	121.11	1.44	1.41	58.25	42.09	17.09	412.45	4.07	0.02	9.6	10.65	-10.94	11.19	4.28	0	0
57	s57	GC	1	1.59	4.01	-1	0.97	123.79	1.5	1.58	57.29	42.71	13.84	422.8	4.86	0.04	1.33	3.12	-1.2	1.04	115.29	1.37	1.34	58.59	41.41	16.59	364.8	4.3	0.04	1.47	2.77	-1	1.01	119.38	1.49	1.5	58.09	41.91	15.53	401.9	4.7	0.04	11.5	14.3	-24.35	13.6	2	0	1
57	s57	GC	2	1.34	2.2	-0.62	0.99	122.78	1.27	1.08	57.99	41.86	16.76	421.62	4.3	0.02	1.26	2.27	-0.89	0.98	123.26	1.08	1.4	58.85	42.13	16.72	414.64	4.08	0.03	1.19	3.05	0.5	0.97	120.64	1.3	1.35	58.82	41.47	16.36	405.18	4.36	0.03	9.39	10.25	-9.16	10.4	4.69	1.39	1.75
57	s57	GC	3	1.42	2.93	-0.33	1.07	122.73	1.23	1.31	57.89	42.34	15.73	424.04	3.99	0.03	1.19	2.32	0.98	1.01	122.14	1.15	1.2	58.35	41.25	14.88	416.7	4.26	0.03	1.22	2.29	-0.4	0.99	121.19	1.22	1.3	58.57	42.01	16.48	411.35	3.91	0.03	9.93	10.71	-7.85	10.46	5.75	0	0
58	s58	GC	1	1.27	2.23	3.6	0.98	122.5	1.24	1.27	62.28	37.72	13.81	398.3	4.18	0.02	1.19	2.21	4.5	1.02	115.73	1.22	1.19	62.66	37.34	25.95	376.8	4.03	0.03	1.3	2.88	2.9	0.99	121.3	1.26	1.29	61.69	38.31	24.4	402.9	4.23	0.02	8.5	12.4	-45.88	8	7	0	0
58	s58	GC	2	1.37	3.76	-0.6	1.1	109.52	1.22	1.13	63.12	36.88	26.25	361.9	3.85	0.02	1.08	2.87	-4.8	1.11	108.16	1.19	1.08	63.16	36.84	27.96	349	3.71	0.02	1.1	3.19	-5	1.13	106.17	1.24	1.1	62.93	37.07	27.05	351.7	3.79	0.01	9.3	14	-50.54	9.3	5	0	0
58	s58	GC	3	1.19	2.34	0.78	1.04	122.15	1.32	1.42	57.31	42.17	16.43	423.39	4.32	0.02	1.11	2.94	1.43	1	122.2	1.1	1.37	57.58	43.16	14.72	412.65	4.21	0.03	1.31	2.55	-0.85	0.95	119.52	1.2	1.15	58.39	41.61	16.42	407.86	3.91	0.03	8.94	10.9	-21.92	10.56	5.2	0	0
59	s59	GC	1	1.25	2.51	4	0.98	116.22	1.25	1.26	56.63	43.37	13.77	291.5	3.9	0.04	1.18	1.79	6.3	1.02	114.9	1.22	1.2	56.38	43.62	14	312.2	3.73	0.04	1.25	1.75	2.4	1.04	115.25	1.26	1.23	56.07	43.93	13.18	310.2	3.8	0.04	12.1	14.5	-19.83	13.3	7	0	2
59	s59	GC	2	1.47	1.71	4	0.92	123.17	1.37	1.47	57.6	42.4	10.57	372	4.55	0.02	1.32	2.86	-1.1	1	119.89	1.29	1.32	55.88	44.12	12.01	341.1	4.11	0.03	1.39	3.34	0.6	0.98	122.69	1.32	1.39	55.69	44.31	10.97	353	4.2	0.02	11.9	14.8	-24.37	14.2	7	1	1
59	s59	GC	3	1.12	2.44	-2.4	1.07	112.16	1.17	1.12	56.62	43.38	14.13	321.6	3.58	0.03	1.26	2.57	-1.1	1.02	117.95	1.25	1.26	56.01	43.99	12.42	342.7	3.96	0.03	1.22	3.33	-1.7	1.04	115.15	1.24	1.22	56.44	43.56	13.48	332.6	3.85	0.03	11.5	13	-13.04	14	6	1	1
60	s60	GC	1	1.26	2.53	-3.1	1	113.21	1.18	1.17	62.5	37.5	18.44	327	4.09	0.04	1.25	3.66	-2.9	1.02	117.86	1.28	1.27	59.07	40.93	16.93	386.6	3.97	0.03	1.24	2.36	-2.7	1.02	117.6	1.25	1.24	59.07	40.93	17.05	400.4	3.89	0.03	9.3	11.8	-26.88	10.4	1	1	3
60	s60	GC	2	1.53	2.67	3.8	0.87	137.38	1.32	1.53	56.86	43.14	12.04	459.3	4.79	0.02	1.34	2.56	2.9	0.93	129.28	1.21	1.34	57.57	42.43	13.82	422	4.3	0.02	1.44	2.15	3	0.92	129.92	1.3	1.44	57.21	42.79	12.99	420.1	4.48	0.02	8.4	10.5	-25	9.1	1	3	2
60	s60	GC	3	1.2	2.38	4.7	1	120.25	1.18	1.2	59.65	40.35	17.53	424	4.01	0.03	1.24	2.49	3.6	1	120.05	1.22	1.24	59.08	40.92	16.6	427.8	4.1	0.03	1.27	3	3.1	1.01	119.2	1.26	1.27	58.94	41.06	16.4	425.9	4.15	0.02	9.3	11.4	-22.58	10.3	3	0	0
[truncated: 35 more columns]
